# Supplementary material for: Minigene as a Novel Regulatory Element in Toxin-Antitoxin Systems
Source: MDPI journal article supplement (doi:10.3390/ijms222413389), 2021-12-13
Supplement: s1 [file s1]

# Minigene as a novel regulatory element in the toxin-antitoxin systems

Barbara Kędzierska <sup>1,\*</sup>, Katarzyna Potrykus <sup>1</sup>

**Table S1.** Plasmids used in this work.

| Plasmid              | Description                                                                                                                                                             | Source    |
|----------------------|-------------------------------------------------------------------------------------------------------------------------------------------------------------------------|-----------|
| pRW225               | RK2-based low copy number vector; enables cloning promoter fragment carrying own translation signals in fusion to lacZ gene between EcoRI and HindIII; Tet <sup>R</sup> | [24]      |
| pRW_ATGmg1           | A derivative of pRW225 with paxe promoter sequence up to the ATG 1 amplified with primers 29 and 141; ATG acts as a start codon for lacZ reporter gene.                 | This work |
| pRW_GTG              | A derivative of pRW225 with paxe promoter sequence up to the GTG amplified with primers 29 and 203; GTG acts as a start codon for lacZ reporter gene.                   | This work |
| pRW_ATGmg2           | A derivative of pRW225 with paxe promoter sequence up to the ATG 2 amplified with primers 29 and 142; ATG acts as a start codon for lacZ reporter gene.                 | This work |
| pRW_ATGtxe           | A derivative of pRW225 with paxe promoter sequence up to the ATG txe amplified with primers 29 and 143; ATG acts as a start codon for lacZ reporter gene.               | This work |
| pRW_ATGtxe_ATGmg1mut | A derivative of pRW_ATGtxe where ATG 1 was mutated to ACG with primers 174 and 175                                                                                      | This work |
| pRW_ATGtxe_GTG/SDmut | A derivative of pRW_ATGtxe where GTG was mutated to CTG with primers 204 and 205                                                                                        | This work |
| pRW_ATGtxe_ATGmg2mut | A derivative of pRW_ATGtxe where ATG 2 was mutated to ACG with primers 98 and 140                                                                                       | This work |
| pRW_ATGtxe_mg2mut    | A derivative of pRW_ATGtxe where ATG and TAA of mg2 were mutated to ACG and TTA with primers 178 and 179                                                                | This work |
| pRW_ATGtxe_mg1,2mut  | A derivative of pRW_ATGtxe_mg2mut where ATG 1 was mutated to ACG with primers 174 and 175                                                                               | This work |
| pRW_ATGtxe_w/o mg1,2 | A derivative of pRW_ATGtxe where a sequence with minigenes was deleted with primers 143 and 211                                                                         | This work |
| pRW_ATGtxe-1         | A derivative of pRW_ATGtxe where the distance between ATG 2 and ATG txe was changed by -1 with primers 143 and 212 (deletion of T)                                      | This work |
| pRW_ATGtxe-2         | A derivative of pRW_ATGtxe where the distance between ATG 2 and ATG txe was changed by -2 with primers 143 and 214 (deletion of TC)                                     | This work |
| pRW_ATGtxe+1         | A derivative of pRW_ATGtxe where the distance between ATG 2 and ATG txe was changed by +1 with primers 143 and 207 (insertion of C)                                     | This work |
| pRW_ATGtxe+2         | A derivative of pRW_ATGtxe where the distance between ATG 2 and ATG txe was changed by +2 with primers 143 and 209 (insertion of TC)                                    | This work |
| pRW_ATGtxe+3         | A derivative of pRW_ATGtxe where the distance between ATG 2 and ATG txe was changed by +3 with                                                                          | This work |

|                            |                                                                                                                                                                                                          |           |
|----------------------------|----------------------------------------------------------------------------------------------------------------------------------------------------------------------------------------------------------|-----------|
|                            | primers 143 and 216 (insertion of CTC)                                                                                                                                                                   |           |
| pRW_ATGtxe+4               | A derivative of pRW_ATGtxe where the distance between ATG 2 and ATG txe was changed by +4 with primers 143 and 218 (insertion of TCTC)                                                                   | This work |
| pRW_ATGtxe+5               | A derivative of pRW_ATGtxe where the distance between ATG 2 and ATG txe was changed by +5 with primers 143 and 220 (insertion of CTCTC)                                                                  | This work |
| pRW_ATGtxe+6               | A derivative of pRW_ATGtxe where the distance between ATG 2 and ATG txe was changed by +6 with primers 143 and 222 (insertion of TCTCTC)                                                                 | This work |
| pRW_ATGtxe-1_mg2mut        | A derivative of pRW_ATGtxe-1 with the mg2 mutated with primers 178 and 179                                                                                                                               | This work |
| pRW_ATGtxe-2mg2mut         | A derivative of pRW_ATGtxe-2 with the mg2 mutated with primers 178 and 179                                                                                                                               | This work |
| pRW_ATGtxe+1_mg2mut        | A derivative of pRW_ATGtxe+1 with the mg2 mutated with primers 178 and 179                                                                                                                               | This work |
| pRW_ATGtxe+2_mg2mut        | A derivative of pRW_ATGtxe+2 with the mg2 mutated with primers 178 and 179                                                                                                                               | This work |
| pRW_ATGtxe+3_mg2mut        | A derivative of pRW_ATGtxe+3 with the mg2 mutated with primers 178 and 179                                                                                                                               | This work |
| pRW_ATGtxe+4_mg2mut        | A derivative of pRW_ATGtxe+4 with the mg2 mutated with primers 178 and 179                                                                                                                               | This work |
| pRW_ATGtxe+5_mg2mut        | A derivative of pRW_ATGtxe+5 with the mg2 mutated with primers 178 and 179                                                                                                                               | This work |
| pRW_ATGtxe+6_mg2mut        | A derivative of pRW_ATGtxe+6 with the mg2 mutated with primers 178 and 179                                                                                                                               | This work |
| pRW_ATGtxe-1_mg2mut_mg1mut | A derivative of pRW_ATGtxe-1_mg2mut with the mg1 mutated with primers 174 and 175                                                                                                                        | This work |
| pRW_ATGtxe+2_mg2mut_mg1mut | A derivative of pRW_ATGtxe+2_mg2mut with the mg1 mutated with primers 174 and 175                                                                                                                        | This work |
| pRW_ATGtxe-1_mg2mut_GTGmut | A derivative of pRW_ATGtxe-1_mg2mut with the GTG mutated with primers 204 and 205                                                                                                                        | This work |
| pRW_ATGtxe+2_mg2mut_GTGmut | A derivative of pRW_ATGtxe+2_mg2mut with the GTG mutated with primers 204 and 205                                                                                                                        | This work |
| pBAD33                     | Arabinose-inducible expression vector, Cm <sup>R</sup>                                                                                                                                                   | [47]      |
| pBAD33mg2                  | A derivative of pBAD33 with the fragment containing minigene 2 amplified with primers 143 and 198, inserted under control of p <sub>BAD</sub> promoter between PstI and HindIII restriction sites        | This work |
| pBAD33mg1,2                | A derivative of pBAD33 with the fragment containing minigenes 1 and 2 amplified with primers 143 and 197, inserted under control of p <sub>BAD</sub> promoter between PstI and HindIII restriction sites | This work |

**Table S2.** Oligonucleotides used in this study. Restriction enzyme sites and mutated positions are underlined.

| Name | Sequence (5'-3')                              | Description                                                                                                          |
|------|-----------------------------------------------|----------------------------------------------------------------------------------------------------------------------|
| 29   | CGCGGGAATTC <u>CTAGAAATAAATAAG</u><br>GGGT    | Forward primer containing EcoRI site for amplification of paxe promoter fragments to clone to pRW225                 |
| 141  | GCAAAGCTTCATCTCCTCGACG                        | Reverse primer containing HindIII site for amplification of a fragment with ATG mg1 fused to lacZ to clone to pRW225 |
| 203  | GCAAAGCTTCACCTTTGGAGAATTG                     | Reverse primer containing HindIII site for amplification of a fragment with GTG fused to lacZ to clone to pRW225     |
| 142  | GCAAAGCTTCATGTGTTTTAAATGC                     | Reverse primer containing HindIII site for amplification of a fragment with ATG mg2 fused to lacZ to clone to pRW225 |
| 143  | GCAAAGCTTCATCAGATTCAACCTCG                    | Reverse primer containing HindIII site for amplification of a fragment with ATG txe fused to lacZ to clone to pRW225 |
| 174  | GTCGAGGAGACGAACAATTCTC                        | Forward primer for mutagenesis of ATG mg1 (ATG→ACG)                                                                  |
| 175  | GAGAATTGTTCTCTCCTCGAC                         | Reverse primer for mutagenesis of ATG mg1 (ATG→ACG)                                                                  |
| 204  | CTCCAAAGCTGCATTAAAC                           | Forward primer for mutagenesis of GTG/SD (GTG→CTG)                                                                   |
| 205  | GTTTAAATGCAGCTTTGGAG                          | Reverse primer for mutagenesis of GTG/SD (GTG→CTG)                                                                   |
| 98   | CATTTAAAACACACGACTTAATC                       | Forward primer for mutagenesis of ATG mg2 (ATG→ACG)                                                                  |
| 140  | GATTAAGTCGTGTGTTTTAAATG                       | Reverse primer for mutagenesis of ATG mg2 (ATG→ACG)                                                                  |
| 179  | ATTTAAAACACACGACCTTATCGAGG<br>TTG             | Forward primer for mutagenesis of ATG and STOP codons of mg2 (ATG→ACG and TAA→TTA)                                   |
| 178  | CAACCTCGATAAGGTCGTGTGTTTTA<br>AAT             | Reverse primer for mutagenesis of ATG and STOP codons of mg2 (ATG→ACG and TAA→TTA)                                   |
| 211  | GCAAAGCTTCATCAGATTCAACCTCG<br>AAAGTGTTCTCAACG | Reverse primer for amplification of paxe promoter fragment to the ATG txe, devoid of minigenes sequence in between   |
| 212  | GCAAAGCTTCATCAGATTCAACCTCG<br>TTAAGTCATG      | Reverse primer for amplification of paxe fragment to ATG txe with a deletion of T                                    |
| 214  | GCAAAGCTTCATCAGATTCAACCTCT<br>TAAGTCATG       | Reverse primer for amplification of paxe fragment to ATG txe with a deletion of TC                                   |
| 207  | GCAAAGCTTCATCAGATTCAACCTCG<br>AGTTAAGTCATG    | Reverse primer for amplification of paxe fragment to ATG txe with an insertion of C                                  |
| 209  | GCAAAGCTTCATCAGATTCAACCTCG<br>AGATTAAGTCATG   | Reverse primer for amplification of paxe fragment to ATG txe with an insertion of TC                                 |
| 216  | GCAAAGCTTCATCAGATTCAACCTCG<br>AGAGTTAAGTCATG  | Reverse primer for amplification of paxe fragment to ATG txe with an insertion of CTC                                |

|     |                                                             |                                                                                                                          |
|-----|-------------------------------------------------------------|--------------------------------------------------------------------------------------------------------------------------|
| 218 | GCAA <u>AAGCTT</u> CATCAGATTCAACCTCG<br>AGAGATTAAGTCATG     | Reverse primer for amplification of paxe fragment to ATG txe with an insertion of TCTC                                   |
| 220 | GCAA <u>AAGCTT</u> CATCAGATTCAACCTCG<br>AGAGAGTTAAGTCATG    | Reverse primer for amplification of paxe fragment to ATG txe with an insertion of CTCTC                                  |
| 222 | GCAA <u>AAGCTT</u> CATCAGATTCAACCTCG<br>AGAGAGATTAAGTCATG   | Reverse primer for amplification of paxe fragment to ATG txe with an insertion of TCTCTC                                 |
| 213 | GCAA <u>AAGCTT</u> CATCAGATTCAACCTCG<br>TAAGGTCGTGTG        | Reverse primer for amplification of paxe fragment to ATG txe with a deletion of T and mutation of mg2                    |
| 215 | GCAA <u>AAGCTT</u> CATCAGATTCAACCTCT<br>AAGGTCGTGTG         | Reverse primer for amplification of paxe fragment to ATG txe with a deletion of TC and mutation of mg2                   |
| 208 | GCAA <u>AAGCTT</u> CATCAGATTCAACCTCG<br>AGTAAGGTCGTGTG      | Reverse primer for amplification of paxe fragment to ATG txe with an insertion of C and mutation of mg2                  |
| 210 | GCAA <u>AAGCTT</u> CATCAGATTCAACCTCG<br>AGATAAGGTCGTGTG     | Reverse primer for amplification of paxe fragment to ATG txe with an insertion of TC and mutation of mg2                 |
| 217 | GCAA <u>AAGCTT</u> CATCAGATTCAACCTCG<br>AGAGTAAGGTCGTGTG    | Reverse primer for amplification of paxe fragment to ATG txe with an insertion of CTC and mutation of mg2                |
| 219 | GCAA <u>AAGCTT</u> CATCAGATTCAACCTCG<br>AGAGATAAGGTCGTGTG   | Reverse primer for amplification of paxe fragment to ATG txe with an insertion of TCTC and mutation of mg2               |
| 221 | GCAA <u>AAGCTT</u> CATCAGATTCAACCTCG<br>AGAGAGTAAGGTCGTGTG  | Reverse primer for amplification of paxe fragment to ATG txe with an insertion of CTCTC and mutation of mg2              |
| 223 | GCAA <u>AAGCTT</u> CATCAGATTCAACCTCG<br>AGAGAGATAAGGTCGTGTG | Reverse primer for amplification of paxe fragment to ATG txe with an insertion of TCTCTC and mutation of mg2             |
| 197 | TAGT <u>CTGCAGT</u> GGAATAATTCGTCG<br>AGG                   | Forward primer for amplification of a fragment containing minigenes 1 and 2 sequence, to clone to pBAD33, with PstI site |
| 198 | TAGT <u>CTGCAGT</u> GGAACAATTCTCCAAA<br>GGTGC               | Forward primer for amplification of a fragment containing minigene 2 sequence, to clone to pBAD33, with PstI site        |

**Table S3.** A list of bacterial strains tested for the presence of two-ORF minigenes. In the indicated TA families two-ORF minigenes were not found.

| Bacterial strain                                                   | TA family |
|--------------------------------------------------------------------|-----------|
| <i>Escherichia coli</i> CFT073                                     | yefM-yoeB |
| <i>Escherichia coli</i> str. K-12 substr. MG1655                   | yefM-yoeB |
| <i>Lactobacillus rhamnosus</i> Lc 705                              | yefM-yoeB |
| <i>Streptomyces avermitilis</i> MA-4680                            | yefM-yoeB |
| <i>Streptomyces coelicolor</i> A3(2)                               | yefM-yoeB |
| <i>Agrobacterium tumefaciens</i> str. C58 Atu0935                  | relBE     |
| <i>Agrobacterium tumefaciens</i> str. C58 Atu0675                  | relBE     |
| <i>Agrobacterium vitis</i> S4                                      | relBE     |
| <i>Aliivibrio salmonicida</i> LFI1238                              | relBE     |
| <i>Archaeoglobus fulgidus</i> DSM 4304 AF1094                      | relBE     |
| <i>Archaeoglobus fulgidus</i> DSM 4304 AF1081                      | relBE     |
| <i>Archaeoglobus fulgidus</i> DSM 4304 AF1076                      | relBE     |
| <i>Bacteroides fragilis</i> YCH46                                  | relBE     |
| <i>Bartonella henselae</i> str. Houston-1 BH07070                  | relBE     |
| <i>Bifidobacterium longum</i> subsp. <i>infantis</i> ATCC 15697    | relBE     |
| <i>Bradyrhizobium diazoefficiens</i> USDA 110                      | relBE     |
| <i>Brucella melitensis</i> str. 16M                                | relBE     |
| <i>Brucella suis</i> 1330                                          | relBE     |
| <i>Campylobacter jejuni</i> RM1221                                 | relBE     |
| <i>Candidatus Protochlamydia amoebophila</i> UWE25 pc0996          | relBE     |
| <i>Candidatus Protochlamydia amoebophila</i> UWE25 pc1913          | relBE     |
| <i>Caulobacter crescentus</i> CB15 CC_2514                         | relBE     |
| <i>Caulobacter crescentus</i> CB15 CC_0803                         | relBE     |
| <i>Desulfovibrio vulgaris</i> str. Hildenborough                   | relBE     |
| <i>Geobacillus kaustophilus</i> HTA426                             | relBE     |
| <i>Geobacter sulfurreducens</i> PCA GSU2438                        | relBE     |
| <i>Gloeobacter violaceus</i> PCC 7421 glr4239                      | relBE     |
| <i>Gloeobacter violaceus</i> PCC 7421 gsr3527                      | relBE     |
| <i>Gloeobacter violaceus</i> PCC 7421 gsl1825                      | relBE     |
| <i>Helicobacter pylori</i> 26695 HP0895                            | relBE     |
| <i>Idiomarina loihiensis</i> L2TR IL1162                           | relBE     |
| <i>Legionella pneumophila</i> str. Lens lpl1587                    | relBE     |
| <i>Methanococcus maripaludis</i> S2 MMP0477                        | relBE     |
| <i>Methanosarcina mazei</i> Go1 MM_2681                            | relBE     |
| <i>Methylococcus capsulatus</i> str. Bath MCA2652                  | relBE     |
| <i>Mycobacterium bovis</i> AF2122/97 Mb3392                        | relBE     |
| <i>Mycobacterium tuberculosis</i> CDC1551 MT3465                   | relBE     |
| <i>Mycobacterium tuberculosis</i> H37Rv Rv3357                     | relBE     |
| <i>Nitrosomonas europaea</i> ATCC 19718 NE1998                     | relBE     |
| <i>Nitrosomonas europaea</i> ATCC 19718 NE1583                     | relBE     |
| <i>Nitrosomonas europaea</i> ATCC 19718 NE0712                     | relBE     |
| <i>Nostoc</i> sp. PCC 7120 ( <i>Anabaena</i> sp. PCC 7120) all4408 | relBE     |
| <i>Pectobacterium atrosepticum</i> SCRI1043 ECA0444                | relBE     |
| <i>Pectobacterium atrosepticum</i> SCRI1043 ECA0325                | relBE     |
| <i>Photobacterium profundum</i> SS9 PBPRB1200                      | relBE     |
| <i>Photobacterium profundum</i> SS9 PBPRB0955                      | relBE     |
| <i>Pseudomonas aeruginosa</i> PA1 PA1S_26100                       | relBE     |
| <i>Pseudomonas aeruginosa</i> PA1 PA1S_26070                       | relBE     |

|                                                                                         |       |
|-----------------------------------------------------------------------------------------|-------|
| <i>Pseudomonas aeruginosa</i> PAO1 PA0125                                               | relBE |
| <i>Pseudomonas putida</i> KT2440 PP_2499                                                | relBE |
| <i>Pseudomonas putida</i> KT2440 PP_1268                                                | relBE |
| <i>Pseudomonas syringae</i> pv. <i>Tomato</i> str. DC3000 PSPTO_5388                    | relBE |
| <i>Pseudomonas syringae</i> pv. <i>Tomato</i> str. DC3000 PSPTO_3676                    | relBE |
| <i>Shewanella oneidensis</i> MR-1 SO_4642                                               | relBE |
| <i>Sinorhizobium meliloti</i> 1021 SMc00693                                             | relBE |
| <i>Streptococcus agalactiae</i> NEM316 gbs0471                                          | relBE |
| <i>Streptococcus mutans</i> UA159 SMU_895                                               | relBE |
| <i>Streptococcus pneumoniae</i> R6 spr1104                                              | relBE |
| <i>Streptococcus pneumoniae</i> R6 spr0252                                              | relBE |
| <i>Streptococcus pneumoniae</i> TIGR4 SP_0275                                           | relBE |
| <i>Streptomyces cattleya</i> NRRL 8057 = DSM 46488 SCATT_39270                          | relBE |
| <i>Sulfolobus tokodaii</i> str. 7 STS035                                                | relBE |
| <i>Synechocystis</i> sp. PCC 6803 SYNGTS_2983                                           | relBE |
| <i>Synechocystis</i> sp. PCC 6803 ssr1114                                               | relBE |
| <i>Thauera</i> sp. MZ1T Tmz1t_3767                                                      | relBE |
| <i>Thermoanaerobacter tengcongensis</i> MB4                                             | relBE |
| <i>Thermococcus kodakarensis</i> KOD1 TK0966                                            | relBE |
| <i>Thermococcus kodakarensis</i> KOD1 TK0792                                            | relBE |
| <i>Treponema denticola</i> ATCC 35405 TDE1979                                           | relBE |
| <i>Vibrio cholerae</i> O1 biovar <i>El Tor</i> str. N16961 VCA0349                      | relBE |
| <i>Vibrio cholerae</i> O1 biovar <i>El Tor</i> str. N16961 VCA0504                      | relBE |
| <i>Clostridium acetobutylicum</i> ATCC 824 CA_C0493                                     | mazEF |
| <i>Deinococcus radiodurans</i> R1 DR_0661                                               | mazEF |
| <i>Deinococcus radiodurans</i> R1 DR_0416                                               | mazEF |
| <i>Desulfovibrio vulgaris</i> str. Hildenborough DVU1510                                | mazEF |
| <i>Enterococcus faecalis</i> V583 EF3261                                                | mazEF |
| <i>Escherichia coli</i> O157:H7 str. EDL933 Z5835                                       | mazEF |
| <i>Escherichia coli</i> O157:H7 str. Sakai ECs5202                                      | mazEF |
| <i>Geobacter uraniireducens</i> Rf4 Gura_2715                                           | mazEF |
| <i>Gloeobacter violaceus</i> PCC 7421 gsr4049                                           | mazEF |
| <i>Gloeobacter violaceus</i> PCC 7421 gsr2287                                           | mazEF |
| <i>Gloeobacter violaceus</i> PCC 7421 gsr0095                                           | mazEF |
| <i>Lactobacillus johnsonii</i> NCC 533 LJ0588                                           | mazEF |
| <i>Leptospira interrogans</i> serovar <i>Copenhageni</i> str. Fiocruz L1 - 130 LIC11192 | mazEF |
| <i>Leptospira interrogans</i> serovar <i>Lai</i> str. 56601 LA_2844                     | mazEF |
| <i>Leptospira interrogans</i> serovar <i>Lai</i> str. 56601 LA_1780                     | mazEF |
| <i>Methylococcus capsulatus</i> str. Bath MCA3006                                       | mazEF |
| <i>Mycobacterium bovis</i> AF2122/97 Mb1531                                             | mazEF |
| <i>Mycobacterium bovis</i> AF2122/97 Mb0679c                                            | mazEF |
| <i>Mycobacterium bovis</i> AF2122/97 Mb1978c                                            | mazEF |
| <i>Mycobacterium tuberculosis</i> CDC1551 MT2047                                        | mazEF |
| <i>Mycobacterium tuberculosis</i> CDC1551 MT1541                                        | mazEF |
| <i>Mycobacterium tuberculosis</i> CDC1551 MT0689                                        | mazEF |
| <i>Mycobacterium tuberculosis</i> H37Rv Rv0456B                                         | mazEF |
| <i>Mycobacterium tuberculosis</i> H37Rv Rv1943c                                         | mazEF |
| <i>Mycobacterium tuberculosis</i> H37Rv Rv1494                                          | mazEF |
| <i>Neisseria meningitidis</i> MC58 NMB2037                                              | mazEF |
| <i>Nitrosomonas europaea</i> ATCC 19718 NE1580                                          | mazEF |

|                                                                                               |         |
|-----------------------------------------------------------------------------------------------|---------|
| <i>Nocardia farcinica</i> IFM 10152 nfa7700                                                   | mazEF   |
| <i>Nostoc</i> sp. PCC 7120 ( <i>Anabaena</i> sp. PCC 7120) asl3212                            | mazEF   |
| <i>Nostoc</i> sp. PCC 7120 ( <i>Anabaena</i> sp. PCC 7120) asr0757                            | mazEF   |
| <i>Pectobacterium atrosepticum</i> SCRI1043 ECA0583                                           | mazEF   |
| <i>Photorhabdus luminescens</i> subsp. <i>laumondii</i> TTO1 plu2366                          | mazEF   |
| <i>Pseudomonas putida</i> KT2440 PP_0770                                                      | mazEF   |
| <i>Rhodopseudomonas palustris</i> CGA009 RPA0942                                              | mazEF   |
| <i>Staphylococcus aureus</i> subsp. <i>aureus</i> COL SACOL2059                               | mazEF   |
| <i>Staphylococcus aureus</i> subsp. <i>aureus</i> MRSA252 SAR2157                             | mazEF   |
| <i>Staphylococcus aureus</i> subsp. <i>aureus</i> MSSA476 SAS1974                             | mazEF   |
| <i>Staphylococcus aureus</i> subsp. <i>aureus</i> Mu50 SAV2069                                | mazEF   |
| <i>Staphylococcus aureus</i> subsp. <i>aureus</i> MW2 MW1993                                  | mazEF   |
| <i>Staphylococcus aureus</i> subsp. <i>aureus</i> N315 SAS067                                 | mazEF   |
| <i>Staphylococcus epidermidis</i> ATCC 12228 SE1673                                           | mazEF   |
| <i>Staphylococcus epidermidis</i> RP62A SERP1682                                              | mazEF   |
| <i>Streptococcus mutans</i> UA159 SMU_172                                                     | mazEF   |
| <i>Synechococcus</i> sp. WH 8102 SYNW2380                                                     | mazEF   |
| <i>Synechocystis</i> sp. PCC 6803 ssl2245                                                     | mazEF   |
| <i>Thermoanaerobacter tengcongensis</i> MB4                                                   | mazEF   |
| <i>Thermococcus kodakarensis</i> KOD1 TK1815                                                  | mazEF   |
| <i>Brucella melitensis</i> bv. 1 str. 16M BMEI1375                                            | phd-doc |
| <i>Brucella suis</i> 1330 BR0558                                                              | phd-doc |
| <i>Campylobacter jejuni</i> RM1221 CJE1101                                                    | phd-doc |
| <i>Candidatus Protochlamydia amoebophila</i> UWE25 pc1457                                     | phd-doc |
| <i>Candidatus Protochlamydia amoebophila</i> UWE25 pc1022                                     | phd-doc |
| <i>Enterococcus faecalis</i> V583 EF0380                                                      | phd-doc |
| <i>Methanosarcina mazei</i> Go1 MM_0550                                                       | phd-doc |
| <i>Mycobacterium smegmatis</i> str. MC2 155 MSMEG_1277                                        | phd-doc |
| <i>Salmonella enterica</i> subsp. <i>enterica</i> serovar <i>Typhimurium</i> str. LT2 STM3559 | phd-doc |
| <i>Streptococcus pneumoniae</i> TIGR4 SP_0888                                                 | phd-doc |
| <i>Streptomyces coelicolor</i> A3(2) SCO5908                                                  | phd-doc |
| <i>Xanthomonas axonopodis</i> pv. <i>citri</i> str. 306 XAC1195                               | phd-doc |
| <i>Staphylococcus aureus</i> SACH_a19                                                         | phd-doc |

$P_{axe}$   
 →  
 AAGAAACGTTGAGAACACTTTCTAATAATTACGTCATCGAAAAAATTCGTC  
 GAGGAGATGAAACAATTCTCCAAGCTGCATTTAAACACATGACTTAATCGAGGTTGAATCTGATG  
 mg1 GTG mg2 txg

**Figure S1.** Nucleotide sequence of the *txe* leader where deleted fragment is indicated by a strikethrough line – used in the ATGtxe\_w/o mg1,2 construct.

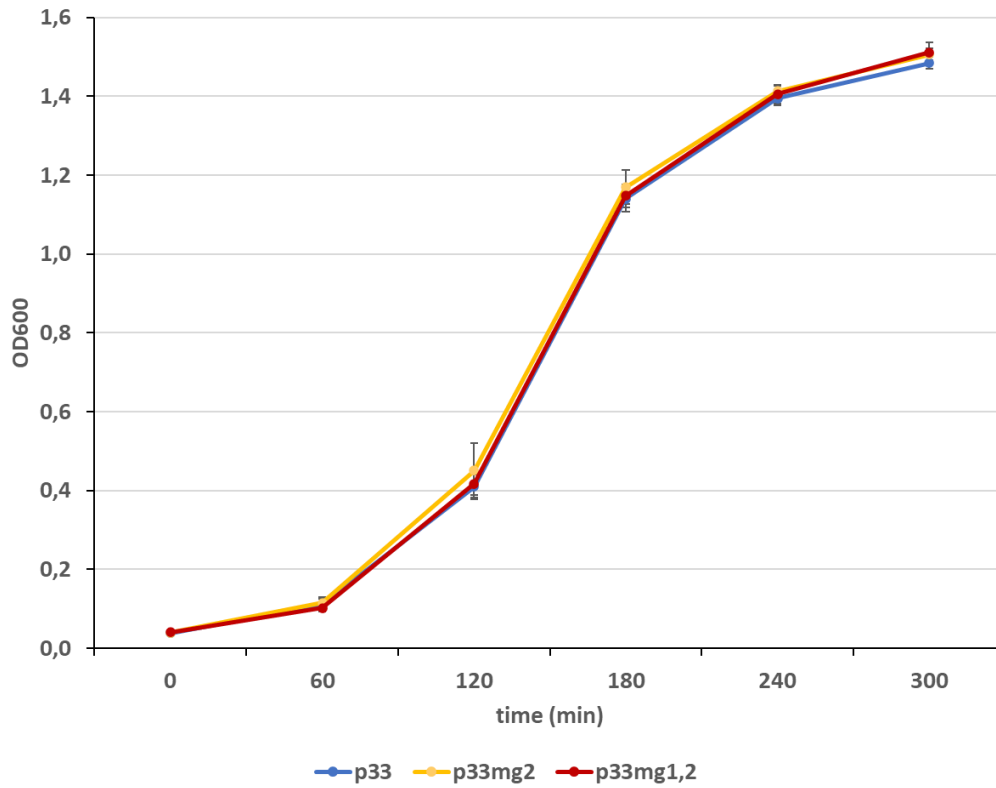

**Figure S2.** Minigenes encoded in the *txe* leader do not display toxic effect on bacterial cell growth. *E. coli*  $\Delta 5\Delta lac$  strain was transformed with pBAD33 or its derivatives, pBAD33\_mg2 or pBAD33\_mg1,2 bearing minigenes under *p<sub>BAD</sub>* promoter. Expression of minigenes was induced by addition of 0.2% L-arabinose at a time of inoculation. Absorbance readings at 600 nm were taken at 60 min. intervals. These results are average of five independent experiments, error bars represent standard deviation (S.D.).



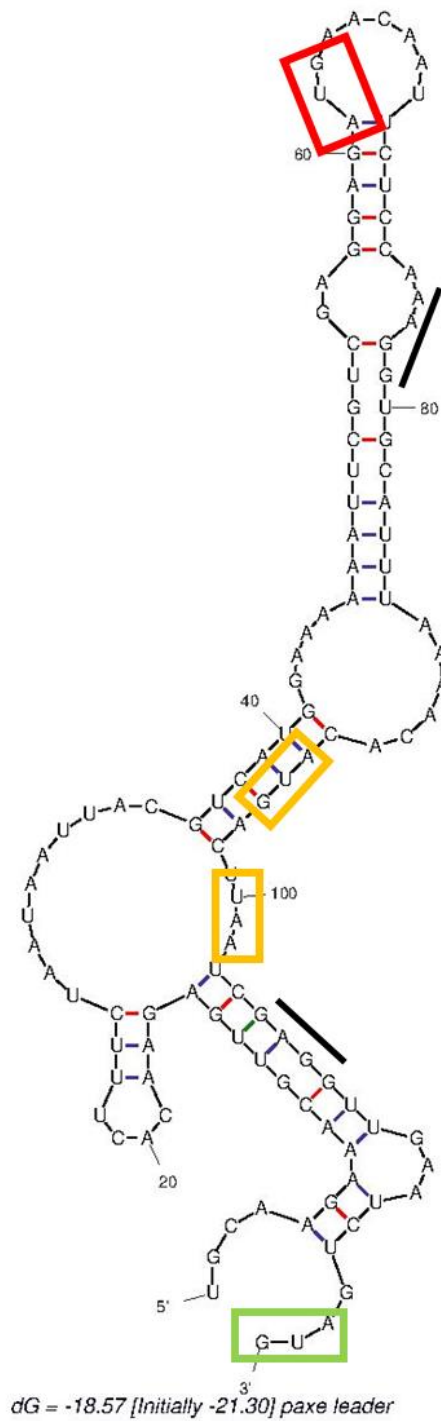

**Figure S3.** Secondary structure of *txe* leader fragment created with the mFOLD program (<http://mfold.rna.albany.edu/>). No evident strong secondary structures are formed. Start codons of *mg1*, *mg2* and ATG*txe* are in colored boxes, red, yellow and green, respectively. UAA *mg2* stop codon is in yellow box. SD sequences are underlined.
